# Supplementary material for: Optimal Regulation of the Cascade Gates Group Water Diversion Project in a Flow Adjustment Period
Source: MDPI journal article supplement (doi:10.3390/w13202825), 2021-10-11
Supplement: s1 [file s1]

Table S1. Basic information of the control gates in the Jingshi section of the MRP.

| Control gate<br>No. | Stake No.  | Gate bottom | Single hole | Number<br>of holes |
|---------------------|------------|-------------|-------------|--------------------|
|                     |            | elevation   | width       |                    |
|                     |            | (m)         | (m)         |                    |
| G48                 | 970 + 379  | 70.403      | 6.6         | 3                  |
| G49                 | 980 + 116  | 67.787      | 6.0         | 3                  |
| G50                 | 1002 + 169 | 66.721      | 6.0         | 3                  |
| G51                 | 1017 + 385 | 65.344      | 6.0         | 3                  |
| G52                 | 1036 + 963 | 64.554      | 5.5         | 3                  |
| G53                 | 1046 + 196 | 63.785      | 5.5         | 3                  |
| G54                 | 1071 + 847 | 65.151      | 7.0         | 3                  |
| G55                 | 1085 + 024 | 61.643      | 6.0         | 3                  |
| G56                 | 1112 + 074 | 60.588      | 7.8         | 2                  |
| G57                 | 1121 + 840 | 60.783      | 5.0         | 3                  |
| G58                 | 1136 + 825 | 57.492      | 5.0         | 2                  |
| G59                 | 1157 + 652 | 55.764      | 5.5         | 2                  |
| G60                 | 1172 + 353 | 55.596      | 5.4         | 2                  |
| G61                 | 1197 + 669 | 55.974      | —           | 2                  |

Table S2. Basic information of the diversion gates in the Jingshi section of the MRP.

| <b>Diversion<br/>gate No.</b> | <b>Stake No.</b> | <b>Diversion<br/>gate No.</b> | <b>Stake No.</b> |
|-------------------------------|------------------|-------------------------------|------------------|
| F63                           | 983 +866         | F69                           | 1079 + 569       |
| F64                           | 1007 + 496       | F70                           | 1104 + 313       |
| F65                           | 1030 + 769       | F71                           | 1117 + 631       |
| F66                           | 1036 + 023       | F72                           | 1156 + 414       |
| F67                           | 1061 + 371       | F73                           | 1180 + 707       |
| F68                           | 1070 + 370       | F74                           | 1195 + 724       |
| F86                           | 1121 + 720       |                               |                  |

Table S3. Basic information of the exit gates in the Jingshi section of the MRP.

| <b>Exit gate No.</b> | <b>Stake No.</b> | <b>Exit gate No.</b> | <b>Stake No.</b> |
|----------------------|------------------|----------------------|------------------|
| T42                  | 977+801          | T48                  | 1096 + 976       |
| T43                  | 993+346          | T49                  | 1110 + 179       |
| T44                  | 1015+126         | T50                  | 1135 + 088       |
| T45                  | 1044+822         | T51                  | 1157 + 002       |
| T46                  | 1077+350         | T52                  | 1184 + 713       |
| T47                  | 1084+675         | T53                  | 1197 + 636       |

Table S4. Basic information of the channels in the Jingshi Section of the MRP.

| Channel<br>pool No. | Entrance | Outlet | Entrance  | Outlet    | Bottom<br>width<br>(m) | Slope<br>coefficient | Design<br>roughness |
|---------------------|----------|--------|-----------|-----------|------------------------|----------------------|---------------------|
|                     |          |        | bottom    | bottom    |                        |                      |                     |
|                     |          |        | elevation | elevation |                        |                      |                     |
|                     |          |        | (m)       | (m)       |                        |                      |                     |
| C1                  | G48      | G49    | 70.403    | 69.821    | 10.0–22.2              | 2.5–3.0              | 0.014               |
| C2                  | G49      | G50    | 69.987    | 69.129    | 18.0–23.5              | 2.0–3.0              | 0.014               |
| C3                  | G50      | G51    | 68.879    | 68.360    | 18.0–21.5              | 2.5–3.0              | 0.014               |
| C4                  | G51      | G52    | 67.574    | 66.513    | 18.0–22.0              | 2.5–3.0              | 0.014               |
| C5                  | G52      | G53    | 66.284    | 65.998    | 15.0–16.5              | 3.0                  | 0.014               |
| C6                  | G53      | G54    | 65.985    | 65.151    | 18.7–23.0              | 2.0–2.5              | 0.014               |
| C7                  | G54      | G55    | 65.151    | 64.264    | 18.5–23.0              | 2.0–2.5              | 0.014               |
| C8                  | G55      | G56    | 64.140    | 61.525    | 15.0–23.0              | 1.0–2.5              | 0.014               |
| C9                  | G56      | G57    | 61.143    | 60.783    | 18.5–22.5              | 0.75–2.5             | 0.014               |
| C10                 | G57      | G58    | 60.679    | 59.877    | 14.5–20.0              | 1.0–2.5              | 0.014               |
| C11                 | G58      | G59    | 59.767    | 58.649    | 7.5–12.5               | 0.8–2.5              | 0.014               |
| C12                 | G59      | G60    | 58.542    | 57.788    | 7.5–12.1               | 0.75–2.5             | 0.014               |
| C13                 | G60      | G61    | 57.696    | 55.974    | 7.5–13.0               | 0.75–2.5             | 0.014               |

Table S5. The initial state and constraint conditions of the control gate.

| Gate No. | Initial water | Target water | Initial opening<br>(mm) |
|----------|---------------|--------------|-------------------------|
|          | level         | level        |                         |
|          | (m)           | (m)          |                         |
| G48      | 76.49         | 76.58        | 1010                    |
| G49      | 74.89         | 74.97        | 940                     |
| G50      | 73.82         | 73.89        | 930                     |
| G51      | 72.53         | 72.58        | 850                     |
| G52      | 71.31         | 71.36        | 1070                    |
| G53      | 70.48         | 70.52        | 1010                    |
| G54      | 69.4          | 69.44        | 720                     |
| G55      | 68.58         | 68.61        | 590                     |
| G56      | 65.92         | 65.93        | 1300                    |
| G57      | 65.21         | 65.21        | 480                     |
| G58      | 64.07         | 64.05        | 1030                    |
| G59      | 62.86         | 62.83        | 880                     |
| G60      | 61.99         | 61.99        | 640                     |
| G61      | 60.14         | 60.16        | /                       |
